# Supplementary material for: Physical Activity and Diet Quality Modify the Association between Comorbidity and Disability among Stroke Patients
Source: MDPI journal article supplement (doi:10.3390/nu13051641), 2021-05-13
Supplement: s1 [file s1]

**Table S1.** Construct and convergent validity, internal consistency, floor and ceiling effects the healthy eating score ( $n=951$ ).

| Factor loading value*                                                     | DASH-Q           |                  |                  |
|---------------------------------------------------------------------------|------------------|------------------|------------------|
|                                                                           | Component 1      | Component 2      | Component 3      |
| 1. Nuts or peanut butter                                                  | 0.67             |                  |                  |
| 2. Beans, peas, or lentils                                                | 0.72             |                  |                  |
| 3. Eggs                                                                   | 0.71             |                  |                  |
| 4. Pickles, olives, or other vegetables in brine                          | 0.78             |                  |                  |
| 5. Fruits and vegetables ( $\geq 5$ servings)                             |                  | 0.75             |                  |
| 6. Fruits ( $>1$ serving)                                                 |                  | 0.86             |                  |
| 7. Vegetables ( $>1$ serving)                                             |                  | 0.81             |                  |
| 8. Broccoli, collard greens, spinach, potatoes, squash, or sweet potatoes |                  |                  | 0.82             |
| 9. Apples, bananas, oranges, melon, or raisins                            |                  |                  | 0.70             |
| 10. Whole-grain breads, cereals, grits, oatmeal, or brown rice            |                  |                  | 0.75             |
| Percentage of variance, %                                                 |                  | 62.76            |                  |
| Item-subscale convergent validity, mean of Rho (range)                    | 0.74 (0.70-0.80) | 0.83 (0.74-0.89) | 0.76 (0.70-0.80) |
| Item-overall scale convergent validity, mean of Rho (range)               |                  | 0.56 (0.40-0.73) |                  |
| Internal consistency, Cronbach's alpha                                    |                  | 0.74             |                  |
| Floor effects, %                                                          |                  | 0.70             |                  |
| Ceiling effect, %                                                         |                  | 0.00             |                  |

Abbreviation: DASH-Q, dietary approaches to stop hypertension quality; Rho, Spearman's correlation coefficient.

\*Principal component analysis using Promax rotation method. The item removed is "drink milk (in a glass, with cereal, or in coffee, tea, or cocoa)" with factor loading of -0.45 on component 2, and 0.41 on component 3 in the initial analysis.

**Table S2.** Associated factors of disability via bivariate linear regression analysis ( $n=951$ ).

|                                   |  | WHODAS II            |        |
|-----------------------------------|--|----------------------|--------|
|                                   |  | B (95%CI)*           | p      |
| Age, year                         |  |                      |        |
| 19-59                             |  |                      |        |
| 60-69                             |  | 0.83 (-1.36, 3.02)   | 0.455  |
| 70-79                             |  | 2.91 (0.57, 5.25)    | 0.015  |
| 80-99                             |  | 6.16 (3.56, 8.75)    | <0.001 |
| Gender                            |  |                      |        |
| Women                             |  |                      |        |
| Men                               |  | -1.87 (-3.62, -0.13) | 0.035  |
| Marital status                    |  |                      |        |
| Married                           |  |                      |        |
| Single or Widow/Divorce/Separate  |  | 2.76 (0.13, 5.40)    | 0.04   |
| Education attainment              |  |                      |        |
| Illiterate or elementary          |  |                      |        |
| Junior high                       |  | -0.73 (-3.16, 1.69)  | 0.553  |
| Senior high                       |  | -2.98 (-5.42, -0.54) | 0.017  |
| College/university or higher      |  | -4.21 (-6.71, -1.71) | 0.001  |
| Occupation                        |  |                      |        |
| Working                           |  |                      |        |
| Retired or infirmity              |  | 5.98 (4.30, 7.66)    | <0.001 |
| Ability to pay for medication     |  |                      |        |
| Very or fairly difficult          |  |                      |        |
| Very or fairly easy               |  | -0.55 (-2.28, 1.17)  | 0.528  |
| Social status                     |  |                      |        |
| Low                               |  |                      |        |
| Middle or high                    |  | -1.29 (-3.96, 1.38)  | 0.344  |
| BMI, kg/m <sup>2</sup>            |  |                      |        |
| Under weight (<18.5)              |  | 1.04 (-1.90, 3.98)   | 0.489  |
| Normal weight (18.5 ≤ BMI < 24.0) |  |                      |        |
| Overweight/obese (BMI ≥ 25.0)     |  | -2.75 (-6.17, 0.66)  | 0.114  |
| CCI                               |  |                      |        |
| None                              |  |                      |        |
| One or more                       |  | 8.51 (6.88, 10.14)   | <0.001 |
| Stroke occurrence                 |  |                      |        |
| First-ever                        |  |                      |        |
| Recurrent                         |  | 1.30 (-0.96, 3.56)   | 0.261  |
| Smoking                           |  |                      |        |
| Never smoke                       |  |                      |        |
| Ever smoke                        |  | 1.94 (0.21, 3.68)    | 0.028  |
| Drinking alcohol                  |  |                      |        |
| No                                |  |                      |        |

|                               |                        |        |
|-------------------------------|------------------------|--------|
| Yes                           | -1.71 (-3.58, 0.15)    | 0.071  |
| Physical activity, MET min/wk |                        |        |
| Tertile 1                     |                        |        |
| Tertile 2                     | -7.4 (-9.37, -5.42)    | <0.001 |
| Tertile 3                     | -10.82 (-12.80, -8.85) | <0.001 |
| DASH-Q                        | -0.27 (-0.34, -0.20)   | <0.001 |
| HL index                      | -0.24 (-0.33, -0.16)   | <0.001 |

Abbreviation: WHODAS II, world health organization disability assessment schedule II; BMI, body mass index; CCI, Charlson comorbidity index; MET min/wk, metabolic equivalent task scored in minute per week; DASH-Q, Dietary Approaches to Stop Hypertension quality, HL, health literacy.
